# Supplementary material for: Brain IGF-1 Receptors Control Mammalian Growth and Lifespan through a Neuroendocrine Mechanism
Source: PubMed Central journal article supplement (PMC2573928; doi:10.1371/journal.pbio.0060254), 2008-10-28

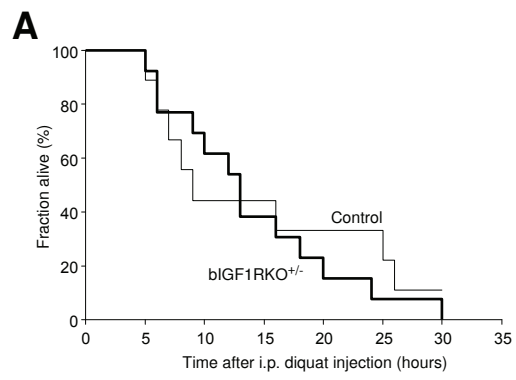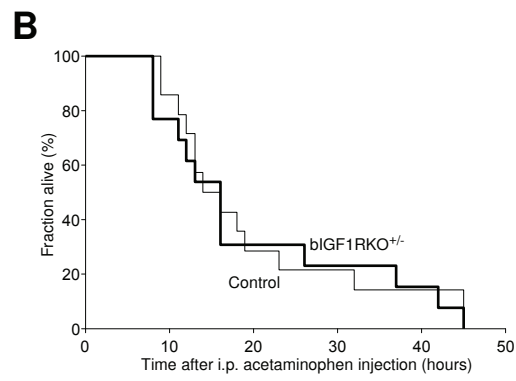

Supplement: pbio.0060254.sg005.pdf [file pbio.0060254.sg005.pdf]
